# Supplementary material for: High-throughput chromatin accessibility profiling at single-cell resolution
Source: PubMed Central journal article supplement (PMC6128862; doi:10.1038/s41467-018-05887-x), 2018-09-07
Supplement: 41467_2018_5887_MOESM1_ESM.pdf [file 41467_2018_5887_MOESM1_ESM.pdf]

## Supplementary Information

### High-throughput chromatin accessibility profiling at single-cell resolution

Anja Mezger<sup>1,2\*</sup>, Sandy Klemm<sup>1,\*</sup>, Ishminder Mann<sup>3</sup>, Kara Brower<sup>4</sup>, Alain Mir<sup>3</sup>, Magnolia Bostick<sup>3</sup>, Andrew Farmer<sup>3</sup>, Polly Fordyce<sup>1,4,5,6</sup>, Sten Linnarsson<sup>2</sup>, and William Greenleaf<sup>1,6,7,#</sup>

<sup>1</sup>Department of Genetics, Stanford University, Stanford, CA, USA.

<sup>2</sup>Department of Medical Biochemistry and Biophysics, Karolinska Institute, Stockholm, Sweden.

<sup>3</sup>Takara Bio USA, Mountain View, CA, USA.

<sup>4</sup>Department of Bioengineering, Stanford University, Stanford, CA, USA.

<sup>5</sup>ChEM-H Institute, Stanford University, Stanford, CA, USA.

<sup>6</sup>Chan Zuckerberg Biohub, San Francisco, CA, USA.

<sup>7</sup>Department of Applied Physics, Stanford University, Stanford, CA, USA.

\*These authors contributed equally.

#To whom correspondence should be addressed: [wjg@stanford.edu](mailto:wjg@stanford.edu).

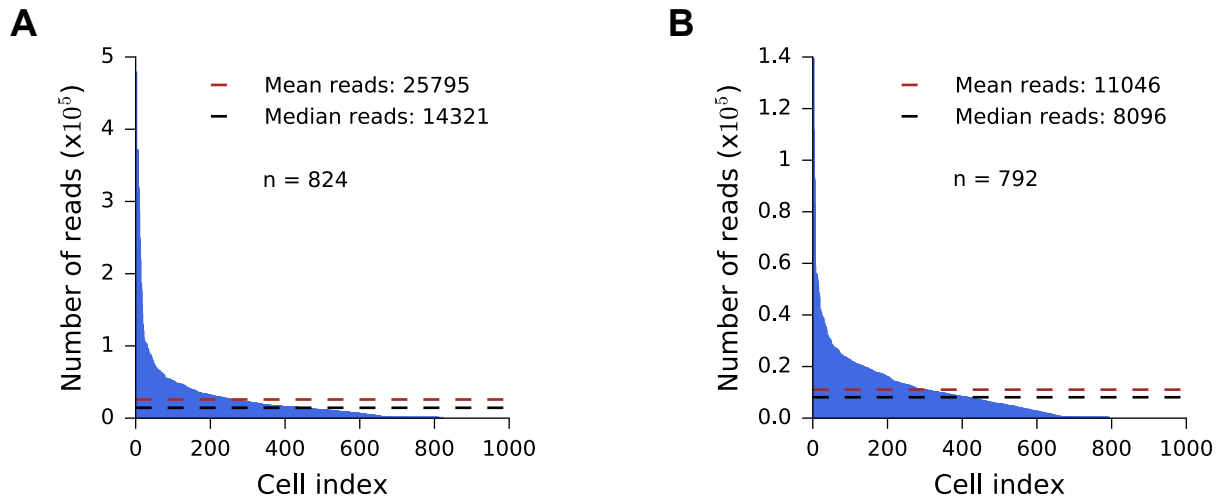

**Supplementary Fig. 1** | Number of fragments per cell for **(A)** Human lymphoblastoid GM12878 cells and **(B)** Mouse embryonic stem cells.

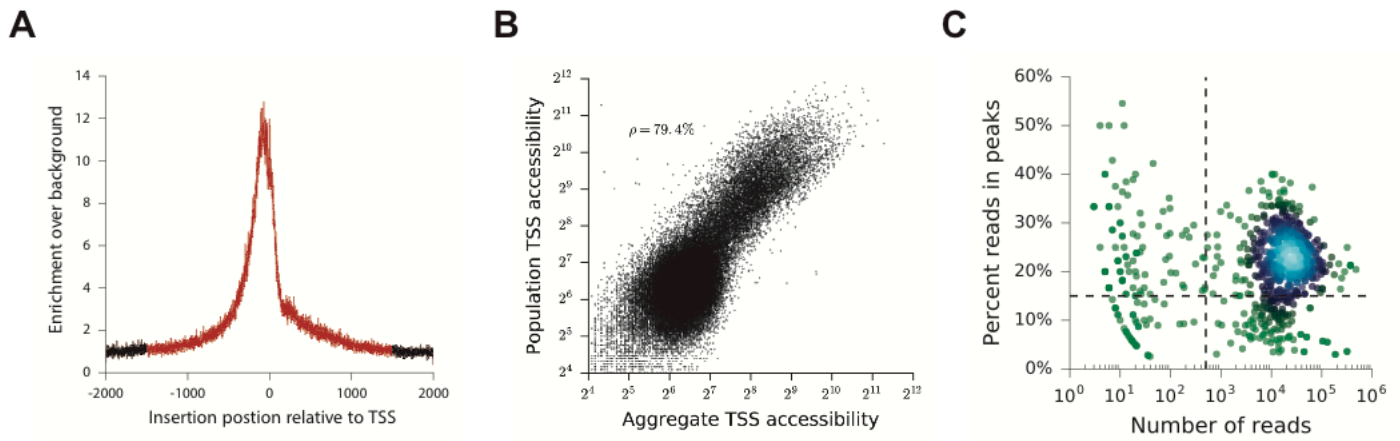

**Supplementary Fig. 2** | (A) Enrichment of aggregated scATAC-seq fragments at transcription start sites for human lymphoblastoid GM12878 cells. (B) Correlation between aggregated scATAC-seq and population ATAC-seq fragments within 2kb upstream and 1kb downstream of transcription start sites for GM12878 cells (2018 Ensembl annotation). (C) Signal-to-background (percent reads in peaks) as a function of read depth for human lymphoblastoid GM12828 cells.

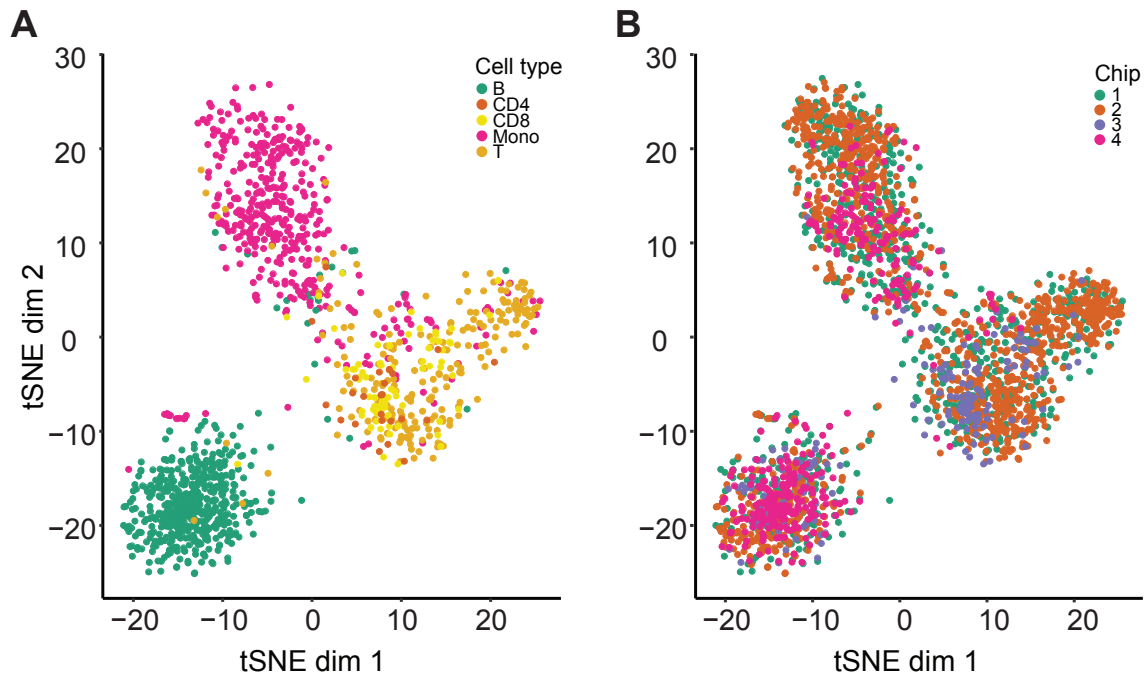

**Supplementary Fig. 3** | (A) tSNE on normalized ChromVar deviations for CD4<sup>+</sup> T, CD8<sup>+</sup> T, T, B and monocyte cells labeled by isolated cell type. (B) tSNE visualization of all analyzed single cells labeled by chip (note that chip 3 was loaded only with B and T cells and chip 4 was loaded only with monocytes and B cells).



**Supplementary Table 2 | Hematopoietic cell type isolation and cluster purity**

|                                             | <b>T cells</b> | <b>CD4 T cells</b> | <b>CD8 T cells</b> | <b>B cells</b> | <b>Monocytes</b> |
|---------------------------------------------|----------------|--------------------|--------------------|----------------|------------------|
| <b>Maximum isolation purity<sup>1</sup></b> | 97%            | 96%                | 91%                | 95%            | 92%              |
| <b>scATAC cluster purity</b>                | 91.4%          | 91.7%              | 91.7%              | 95.3%          | 82.5%            |

<sup>1</sup>Estimates of isolation purity provided by the manufacture (STEMCELL Technologies Inc.)

**Supplementary Table 3** | Custom i5 and i7 indices<sup>1</sup>. All primers have been previously tested and can be used interchangeably.

**Custom Adapter 1 (i5):**

---

|                    |                                                                |
|--------------------|----------------------------------------------------------------|
| v2_Ad1.1_TAGATCGC  | AATGATACGGCGACCACCGAGATCTACACTAGATCGCTCGTCGGCAGCGTCAGATGTGTAT  |
| v2_Ad1.2_CTCTCTAT  | AATGATACGGCGACCACCGAGATCTACACCTCTCTATTTCGTCGGCAGCGTCAGATGTGTAT |
| v2_Ad1.3_TATCCTCT  | AATGATACGGCGACCACCGAGATCTACACTATCCTCTTCGTCGGCAGCGTCAGATGTGTAT  |
| v2_Ad1.4_AGAGTAGA  | AATGATACGGCGACCACCGAGATCTACACAGAGTAGATCGTCGGCAGCGTCAGATGTGTAT  |
| v2_Ad1.5_GTAAGGAG  | AATGATACGGCGACCACCGAGATCTACACGTAAGGAGTCGTCGGCAGCGTCAGATGTGTAT  |
| v2_Ad1.6_ACTGCATA  | AATGATACGGCGACCACCGAGATCTACACACTGCATATCGTCGGCAGCGTCAGATGTGTAT  |
| v2_Ad1.7_AAGGAGTA  | AATGATACGGCGACCACCGAGATCTACACAAGGAGTATCGTCGGCAGCGTCAGATGTGTAT  |
| v2_Ad1.8_CTAAGCCT  | AATGATACGGCGACCACCGAGATCTACACCTAAGCCTTCGTCGGCAGCGTCAGATGTGTAT  |
| v2_Ad1.9_TGGAAATC  | AATGATACGGCGACCACCGAGATCTACACTGGAAATCTCGTCGGCAGCGTCAGATGTGTAT  |
| v2_Ad1.10_AACATGAT | AATGATACGGCGACCACCGAGATCTACACAACATGATTTCGTCGGCAGCGTCAGATGTGTAT |
| v2_Ad1.11_TGATGAAA | AATGATACGGCGACCACCGAGATCTACACTGATGAAATCGTCGGCAGCGTCAGATGTGTAT  |
| v2_Ad1.12_GTCGGACT | AATGATACGGCGACCACCGAGATCTACACGTCGGACTTCGTCGGCAGCGTCAGATGTGTAT  |
| v2_Ad1.13_TTTCTAGC | AATGATACGGCGACCACCGAGATCTACACTTTCTAGCTCGTCGGCAGCGTCAGATGTGTAT  |
| v2_Ad1.14_TAACCAAG | AATGATACGGCGACCACCGAGATCTACACTAACCAAGTCGTCGGCAGCGTCAGATGTGTAT  |
| v2_Ad1.15_GTGTATCG | AATGATACGGCGACCACCGAGATCTACACGTGTATCGTCGGCAGCGTCAGATGTGTAT     |
| v2_Ad1.16_TCCATCAA | AATGATACGGCGACCACCGAGATCTACACTCCATCAATCGTCGGCAGCGTCAGATGTGTAT  |
| v2_Ad1.17_TTCGTGCA | AATGATACGGCGACCACCGAGATCTACACTTCGTGCATCGTCGGCAGCGTCAGATGTGTAT  |
| v2_Ad1.18_AGGTTGCC | AATGATACGGCGACCACCGAGATCTACACAGTTGCCCTCGTCGGCAGCGTCAGATGTGTAT  |
| v2_Ad1.19_CCTTATGT | AATGATACGGCGACCACCGAGATCTACACCCTTATGTTTCGTCGGCAGCGTCAGATGTGTAT |
| v2_Ad1.20_CAGCAACG | AATGATACGGCGACCACCGAGATCTACACCAGCAACGTCGTCGGCAGCGTCAGATGTGTAT  |
| v2_Ad1.21_GGTTCAAT | AATGATACGGCGACCACCGAGATCTACACGGTTCAATTCGTCGGCAGCGTCAGATGTGTAT  |
| v2_Ad1.22_ACATTCGT | AATGATACGGCGACCACCGAGATCTACACACATTCGTTTCGTCGGCAGCGTCAGATGTGTAT |
| v2_Ad1.23_GATTCCCA | AATGATACGGCGACCACCGAGATCTACACGATTCCCATCGTCGGCAGCGTCAGATGTGTAT  |
| v2_Ad1.24_CGGACTGC | AATGATACGGCGACCACCGAGATCTACACCGACTGCTCGTCGGCAGCGTCAGATGTGTAT   |
| v2_Ad1.25_AGCCGTTT | AATGATACGGCGACCACCGAGATCTACACAGCCGTTTCGTCGGCAGCGTCAGATGTGTAT   |
| v2_Ad1.26_ATTGGGTC | AATGATACGGCGACCACCGAGATCTACACATTGGGTCTCGTCGGCAGCGTCAGATGTGTAT  |
| v2_Ad1.27_TGCATACT | AATGATACGGCGACCACCGAGATCTACACTGCATACTTCGTCGGCAGCGTCAGATGTGTAT  |
| v2_Ad1.28_GGGCTTGG | AATGATACGGCGACCACCGAGATCTACACGGCTTGGTCGTCGGCAGCGTCAGATGTGTAT   |
| v2_Ad1.29_GACGTGGC | AATGATACGGCGACCACCGAGATCTACACGACGTGGCTCGTCGGCAGCGTCAGATGTGTAT  |
| v2_Ad1.30_GCAAATTT | AATGATACGGCGACCACCGAGATCTACACGAAATTTTCGTCGGCAGCGTCAGATGTGTAT   |
| v2_Ad1.31_GCAGCCTC | AATGATACGGCGACCACCGAGATCTACACGCAGCCTTCGTCGGCAGCGTCAGATGTGTAT   |
| v2_Ad1.32_TCCGAGTT | AATGATACGGCGACCACCGAGATCTACACTCCGAGTTTCGTCGGCAGCGTCAGATGTGTAT  |
| v2_Ad1.33_GCATTAAG | AATGATACGGCGACCACCGAGATCTACACGCATTAAGTCGTCGGCAGCGTCAGATGTGTAT  |
| v2_Ad1.34_ACGATAAC | AATGATACGGCGACCACCGAGATCTACACACGATAACTCGTCGGCAGCGTCAGATGTGTAT  |
| v2_Ad1.35_CCTGCGGG | AATGATACGGCGACCACCGAGATCTACACCCTGCGGGTCGTCGGCAGCGTCAGATGTGTAT  |
| v2_Ad1.36_TGATTGTT | AATGATACGGCGACCACCGAGATCTACACTGATTGTTTCGTCGGCAGCGTCAGATGTGTAT  |
| v2_Ad1.37_GGCACGGA | AATGATACGGCGACCACCGAGATCTACACGGCACGGATCGTCGGCAGCGTCAGATGTGTAT  |
| v2_Ad1.38_GATCATTC | AATGATACGGCGACCACCGAGATCTACACGATCATTTCGTCGGCAGCGTCAGATGTGTAT   |
| v2_Ad1.39_ATGGTCAT | AATGATACGGCGACCACCGAGATCTACACATGGTCATTTCGTCGGCAGCGTCAGATGTGTAT |
| v2_Ad1.40_CGTACCAA | AATGATACGGCGACCACCGAGATCTACACCGTACCAATCGTCGGCAGCGTCAGATGTGTAT  |
| v2_Ad1.41_CCAGTTTA | AATGATACGGCGACCACCGAGATCTACACCCAGTTTATCGTCGGCAGCGTCAGATGTGTAT  |
| v2_Ad1.42_ACCGGCCC | AATGATACGGCGACCACCGAGATCTACACACCGCCCCTCGTCGGCAGCGTCAGATGTGTAT  |
| v2_Ad1.43_CTAGAAGT | AATGATACGGCGACCACCGAGATCTACACCTAGAAGTTCGTCGGCAGCGTCAGATGTGTAT  |
| v2_Ad1.44_CGCCAGAT | AATGATACGGCGACCACCGAGATCTACACCGCCAGATTCGTCGGCAGCGTCAGATGTGTAT  |
| v2_Ad1.45_TCACATGG | AATGATACGGCGACCACCGAGATCTACACTCACATGGTCGTCGGCAGCGTCAGATGTGTAT  |
| v2_Ad1.46_GAACTCGA | AATGATACGGCGACCACCGAGATCTACACGAACTCGATCGTCGGCAGCGTCAGATGTGTAT  |
| v2_Ad1.47_CCACCGTT | AATGATACGGCGACCACCGAGATCTACACCCACCGTTTCGTCGGCAGCGTCAGATGTGTAT  |

v2\_Ad1.48\_TAAGTTAC  
v2\_Ad1.49\_GAGACGTG  
v2\_Ad1.50\_TTGCTAA  
v2\_Ad1.51\_TTAAGTTG  
v2\_Ad1.52\_CTTTAAACA  
v2\_Ad1.53\_CGTAGACC  
v2\_Ad1.54\_TATTTGCG  
v2\_Ad1.55\_ATCCAGGA  
v2\_Ad1.56\_TGTTCTGT  
v2\_Ad1.57\_ACGCGCAG  
v2\_Ad1.58\_TCTGGCGA  
v2\_Ad1.59\_AATCTACA  
v2\_Ad1.60\_TACTGACC  
v2\_Ad1.61\_CGATAGGG  
v2\_Ad1.62\_ACTTAGAA  
v2\_Ad1.63\_AGAGATCT  
v2\_Ad1.64\_GGTGAAGG  
v2\_Ad1.65\_ATCGAATG  
v2\_Ad1.66\_TCAAGAGC  
v2\_Ad1.67\_GCCACGT  
v2\_Ad1.68\_TGGGCGGT  
v2\_Ad1.69\_CCCTTGGA  
v2\_Ad1.70\_ATTACCGT  
v2\_Ad1.71\_AGTCCGAG  
v2\_Ad1.72\_ACTTGTTG  
v2\_Ad1.73\_GTAATACA  
v2\_Ad1.74\_GGCGTCTA  
v2\_Ad1.75\_GCGCTGCT  
v2\_Ad1.76\_GTGCCATT  
v2\_Ad1.77\_TAGGTATG  
v2\_Ad1.78\_AACACCTA  
v2\_Ad1.79\_CTCCGAAC  
v2\_Ad1.80\_CAACGGCA  
v2\_Ad1.81\_CAATGTAG  
v2\_Ad1.82\_GGCTACCC  
v2\_Ad1.83\_AAAGTCCG  
v2\_Ad1.84\_TTCCGCGG  
v2\_Ad1.85\_AGGCACTT  
v2\_Ad1.86\_CTTCAAGT  
v2\_Ad1.87\_GCCGTTAG  
v2\_Ad1.88\_TTCAATCC  
v2\_Ad1.89\_CCACACAC  
v2\_Ad1.90\_ATATTATC  
v2\_Ad1.91\_CCGAAGCA  
v2\_Ad1.92\_GTATCGGT

AATGATACGGCGACCACCGAGATCTACACTAAGTTACTCGTCGGCAGCGTCAGATGTGTAT  
AATGATACGGCGACCACCGAGATCTACACGAGACGTGTCGTGCGCAGCGTCAGATGTGTAT  
AATGATACGGCGACCACCGAGATCTACACTTGCCTAATCGTCGGCAGCGTCAGATGTGTAT  
AATGATACGGCGACCACCGAGATCTACACTTAACTTGTGTCGTGCGCAGCGTCAGATGTGTAT  
AATGATACGGCGACCACCGAGATCTACACCTTAAACATCGTCGGCAGCGTCAGATGTGTAT  
AATGATACGGCGACCACCGAGATCTACACCGTAGACCTCGTCGGCAGCGTCAGATGTGTAT  
AATGATACGGCGACCACCGAGATCTACACTATTTGCGTCGTGCGCAGCGTCAGATGTGTAT  
AATGATACGGCGACCACCGAGATCTACACATCCAGGATCGTCGGCAGCGTCAGATGTGTAT  
AATGATACGGCGACCACCGAGATCTACACTGTTCTGTGTCGTGCGCAGCGTCAGATGTGTAT  
AATGATACGGCGACCACCGAGATCTACACACGCGCAGTCGTGCGCAGCGTCAGATGTGTAT  
AATGATACGGCGACCACCGAGATCTACACTTGGCGATCGTCGGCAGCGTCAGATGTGTAT  
AATGATACGGCGACCACCGAGATCTACACAATCTACATCGTCGGCAGCGTCAGATGTGTAT  
AATGATACGGCGACCACCGAGATCTACACTACTGACCTCGTCGGCAGCGTCAGATGTGTAT  
AATGATACGGCGACCACCGAGATCTACACCGATAGGGTCGTGCGCAGCGTCAGATGTGTAT  
AATGATACGGCGACCACCGAGATCTACACACTTAGAATCGTCGGCAGCGTCAGATGTGTAT  
AATGATACGGCGACCACCGAGATCTACACAGAGATCTTCGTGCGCAGCGTCAGATGTGTAT  
AATGATACGGCGACCACCGAGATCTACACGGTGAAGGTCGTGCGCAGCGTCAGATGTGTAT  
AATGATACGGCGACCACCGAGATCTACACATCGAATGTCGTGCGCAGCGTCAGATGTGTAT  
AATGATACGGCGACCACCGAGATCTACACTCAAGAGCTCGTCGGCAGCGTCAGATGTGTAT  
AATGATACGGCGACCACCGAGATCTACACGCCACGTTTCGTGCGCAGCGTCAGATGTGTAT  
AATGATACGGCGACCACCGAGATCTACACTGGGCGGTTTCGTGCGCAGCGTCAGATGTGTAT  
AATGATACGGCGACCACCGAGATCTACACCCCTTGATCGTCGGCAGCGTCAGATGTGTAT  
AATGATACGGCGACCACCGAGATCTACACATTACCGTTCGTGCGCAGCGTCAGATGTGTAT  
AATGATACGGCGACCACCGAGATCTACACAGTCCGAGTCGTGCGCAGCGTCAGATGTGTAT  
AATGATACGGCGACCACCGAGATCTACACACTTGTTGTCGTGCGCAGCGTCAGATGTGTAT  
AATGATACGGCGACCACCGAGATCTACACGTAATACATCGTCGGCAGCGTCAGATGTGTAT  
AATGATACGGCGACCACCGAGATCTACACGGCGTCTATCGTCGGCAGCGTCAGATGTGTAT  
AATGATACGGCGACCACCGAGATCTACACGCGCTGTTTCGTGCGCAGCGTCAGATGTGTAT  
AATGATACGGCGACCACCGAGATCTACACGTGCCATTTTCGTGCGCAGCGTCAGATGTGTAT  
AATGATACGGCGACCACCGAGATCTACACTAGGTATGTCGTGCGCAGCGTCAGATGTGTAT  
AATGATACGGCGACCACCGAGATCTACACAACACCTATCGTCGGCAGCGTCAGATGTGTAT  
AATGATACGGCGACCACCGAGATCTACACCTCCGAACTCGTGCGCAGCGTCAGATGTGTAT  
AATGATACGGCGACCACCGAGATCTACACCAACGGCATCGTCGGCAGCGTCAGATGTGTAT  
AATGATACGGCGACCACCGAGATCTACACCAATGTAGTCGTGCGCAGCGTCAGATGTGTAT  
AATGATACGGCGACCACCGAGATCTACACGGCTACCCTCGTCGGCAGCGTCAGATGTGTAT  
AATGATACGGCGACCACCGAGATCTACACAAAGTCCGTCGTGCGCAGCGTCAGATGTGTAT  
AATGATACGGCGACCACCGAGATCTACACTTCCGCGGTCGTGCGCAGCGTCAGATGTGTAT  
AATGATACGGCGACCACCGAGATCTACACAGGCACTTTTCGTGCGCAGCGTCAGATGTGTAT  
AATGATACGGCGACCACCGAGATCTACACCTTCAGTGTGTCGTGCGCAGCGTCAGATGTGTAT  
AATGATACGGCGACCACCGAGATCTACACGCCGTTAGTCGTGCGCAGCGTCAGATGTGTAT  
AATGATACGGCGACCACCGAGATCTACACTTCAATCCTCGTCGGCAGCGTCAGATGTGTAT  
AATGATACGGCGACCACCGAGATCTACACCCACACACTCGTCGGCAGCGTCAGATGTGTAT  
AATGATACGGCGACCACCGAGATCTACACATATTATCTCGTCGGCAGCGTCAGATGTGTAT  
AATGATACGGCGACCACCGAGATCTACACCCGAAGCATCGTCGGCAGCGTCAGATGTGTAT  
AATGATACGGCGACCACCGAGATCTACACGTATCGGTTTCGTGCGCAGCGTCAGATGTGTAT

**Custom Adapter 2 (i7):**

v2\_Ad2.1\_TAAGGCGA  
v2\_Ad2.2\_CGTAAGT  
v2\_Ad2.3\_AGGCAGAA  
v2\_Ad2.4\_TCCTGAGC

CAAGCAGAAGACGGCATAACGAGATTCGCCTTAGTCTCGTGGGCTCGGAGATGTG  
CAAGCAGAAGACGGCATAACGAGATCTAGTACGGTCTCGTGGGCTCGGAGATGTG  
CAAGCAGAAGACGGCATAACGAGATTTCTGCCTGTCTCGTGGGCTCGGAGATGTG  
CAAGCAGAAGACGGCATAACGAGATGCTCAGGAGTCTCGTGGGCTCGGAGATGTG



v2\_Ad2.5\_GGACTCCT  
v2\_Ad2.6\_TAGGCATG  
v2\_Ad2.7\_CTCTCTAC  
v2\_Ad2.8\_CAGAGAGG  
v2\_Ad2.9\_GCTACGCT  
v2\_Ad2.10\_CGAGGCTG  
v2\_Ad2.11\_AAGAGGCA  
v2\_Ad2.12\_GTAGAGGA  
v2\_Ad2.13\_TGGATCTG  
v2\_Ad2.14\_CCGTTTGT  
v2\_Ad2.15\_TGCTGGGT  
v2\_Ad2.16\_AGGTTGGG  
v2\_Ad2.17\_GTGTGGTG  
v2\_Ad2.18\_TGGGTTTC  
v2\_Ad2.19\_TGGTCACA  
v2\_Ad2.20\_TTGACCCT  
v2\_Ad2.21\_CGCGGACA  
v2\_Ad2.22\_TTCCATAT  
v2\_Ad2.23\_AATTCGTT  
v2\_Ad2.24\_GGCGTCGA  
v2\_Ad2.25\_ACAAAGTG  
v2\_Ad2.26\_TACTTGAA  
v2\_Ad2.27\_GTGATAGC  
v2\_Ad2.28\_AGTAGATT  
v2\_Ad2.29\_ATTGCCGG  
v2\_Ad2.30\_TTGCTAAG  
v2\_Ad2.31\_ATAAGTTA  
v2\_Ad2.32\_ATCACTCG  
v2\_Ad2.33\_GTTAACAG  
v2\_Ad2.34\_AATGGTAG  
v2\_Ad2.35\_GAGCACGT  
v2\_Ad2.36\_TTTCGTCA  
v2\_Ad2.37\_CAAGAATT  
v2\_Ad2.38\_GAAATGCC  
v2\_Ad2.39\_AACGCCAT  
v2\_Ad2.40\_CCTCGCAG  
v2\_Ad2.41\_TACACCTC  
v2\_Ad2.42\_GGTCATTT  
v2\_Ad2.43\_CAATCTTA  
v2\_Ad2.44\_TGTGCCTT  
v2\_Ad2.45\_TCTTATTA  
v2\_Ad2.46\_GACTTAGT  
v2\_Ad2.47\_AGACCAGC  
v2\_Ad2.48\_AAATACAG  
v2\_Ad2.49\_TTATGAAA  
v2\_Ad2.50\_CTTGGGTC  
v2\_Ad2.51\_CCAAATAA  
v2\_Ad2.52\_GCGTTAAA  
v2\_Ad2.53\_CATCCTGT  
v2\_Ad2.54\_GGAGTAAG  
v2\_Ad2.55\_GACGCTCC

CAAGCAGAAGACGGCATAACGAGATAGGAGTCCGTCTCGTGGGCTCGGAGATGTG  
CAAGCAGAAGACGGCATAACGAGATCATGCCTAGTCTCGTGGGCTCGGAGATGTG  
CAAGCAGAAGACGGCATAACGAGATGTAGAGAGGTCTCGTGGGCTCGGAGATGTG  
CAAGCAGAAGACGGCATAACGAGATCCTCTCTGGTCTCGTGGGCTCGGAGATGTG  
CAAGCAGAAGACGGCATAACGAGATAGCGTAGCGTCTCGTGGGCTCGGAGATGTG  
CAAGCAGAAGACGGCATAACGAGATCAGCCTCGGTCTCGTGGGCTCGGAGATGTG  
CAAGCAGAAGACGGCATAACGAGATTGCCTCTTGTCTCGTGGGCTCGGAGATGTG  
CAAGCAGAAGACGGCATAACGAGATTCTCTACGTCTCGTGGGCTCGGAGATGTG  
CAAGCAGAAGACGGCATAACGAGATCAGATCCAGTCTCGTGGGCTCGGAGATGTG  
CAAGCAGAAGACGGCATAACGAGATACAAACGGGTCTCGTGGGCTCGGAGATGTG  
CAAGCAGAAGACGGCATAACGAGATACCCAGCAGTCTCGTGGGCTCGGAGATGTG  
CAAGCAGAAGACGGCATAACGAGATCCCAACCTGTCTCGTGGGCTCGGAGATGTG  
CAAGCAGAAGACGGCATAACGAGATCACCACACGTCTCGTGGGCTCGGAGATGTG  
CAAGCAGAAGACGGCATAACGAGATGAAACCCAGTCTCGTGGGCTCGGAGATGTG  
CAAGCAGAAGACGGCATAACGAGATTGTGACCAGTCTCGTGGGCTCGGAGATGTG  
CAAGCAGAAGACGGCATAACGAGATAGGGTCAAGTCTCGTGGGCTCGGAGATGTG  
CAAGCAGAAGACGGCATAACGAGATTGTCCGCGGTCTCGTGGGCTCGGAGATGTG  
CAAGCAGAAGACGGCATAACGAGATATATGGAAGTCTCGTGGGCTCGGAGATGTG  
CAAGCAGAAGACGGCATAACGAGATAACGAATTGTCTCGTGGGCTCGGAGATGTG  
CAAGCAGAAGACGGCATAACGAGATTCGACGCCGTCTCGTGGGCTCGGAGATGTG  
CAAGCAGAAGACGGCATAACGAGATCACTTTGTGTCTCGTGGGCTCGGAGATGTG  
CAAGCAGAAGACGGCATAACGAGATTTCAAGTAGTCTCGTGGGCTCGGAGATGTG  
CAAGCAGAAGACGGCATAACGAGATGCTATCACGTCTCGTGGGCTCGGAGATGTG  
CAAGCAGAAGACGGCATAACGAGATAATCTACTGTCTCGTGGGCTCGGAGATGTG  
CAAGCAGAAGACGGCATAACGAGATCCGGCAATGTCTCGTGGGCTCGGAGATGTG  
CAAGCAGAAGACGGCATAACGAGATCTTAGCAAGTCTCGTGGGCTCGGAGATGTG  
CAAGCAGAAGACGGCATAACGAGATTAACTTATGTCTCGTGGGCTCGGAGATGTG  
CAAGCAGAAGACGGCATAACGAGATCGAGTGATGTCTCGTGGGCTCGGAGATGTG  
CAAGCAGAAGACGGCATAACGAGATCTGTAAACGTCTCGTGGGCTCGGAGATGTG  
CAAGCAGAAGACGGCATAACGAGATCTACCATTGTCTCGTGGGCTCGGAGATGTG  
CAAGCAGAAGACGGCATAACGAGATACGTGCTCGTCTCGTGGGCTCGGAGATGTG  
CAAGCAGAAGACGGCATAACGAGATTGACGAAAGTCTCGTGGGCTCGGAGATGTG  
CAAGCAGAAGACGGCATAACGAGATAATTCTTGGTCTCGTGGGCTCGGAGATGTG  
CAAGCAGAAGACGGCATAACGAGATGGCATTTCGTCTCGTGGGCTCGGAGATGTG  
CAAGCAGAAGACGGCATAACGAGATATGGCGTTGTCTCGTGGGCTCGGAGATGTG  
CAAGCAGAAGACGGCATAACGAGATCTGCGAGGGTCTCGTGGGCTCGGAGATGTG  
CAAGCAGAAGACGGCATAACGAGATGAGGTGTAGTCTCGTGGGCTCGGAGATGTG  
CAAGCAGAAGACGGCATAACGAGATAAATGACCGTCTCGTGGGCTCGGAGATGTG  
CAAGCAGAAGACGGCATAACGAGATTAAGATTGGTCTCGTGGGCTCGGAGATGTG  
CAAGCAGAAGACGGCATAACGAGATAAGGCACAGTCTCGTGGGCTCGGAGATGTG  
CAAGCAGAAGACGGCATAACGAGATTAATAAGAGTCTCGTGGGCTCGGAGATGTG  
CAAGCAGAAGACGGCATAACGAGATACTAAGTCGTCTCGTGGGCTCGGAGATGTG  
CAAGCAGAAGACGGCATAACGAGATGCTGGTCTGTCTCGTGGGCTCGGAGATGTG  
CAAGCAGAAGACGGCATAACGAGATCTGTATTTGTCTCGTGGGCTCGGAGATGTG  
CAAGCAGAAGACGGCATAACGAGATTTTCATAAGTCTCGTGGGCTCGGAGATGTG  
CAAGCAGAAGACGGCATAACGAGATGACCCAAGGTCTCGTGGGCTCGGAGATGTG  
CAAGCAGAAGACGGCATAACGAGATTTATTTGGGTCTCGTGGGCTCGGAGATGTG  
CAAGCAGAAGACGGCATAACGAGATTTTAACCGTCTCGTGGGCTCGGAGATGTG  
CAAGCAGAAGACGGCATAACGAGATACAGGATGGTCTCGTGGGCTCGGAGATGTG  
CAAGCAGAAGACGGCATAACGAGATCTTACTCCGTCTCGTGGGCTCGGAGATGTG  
CAAGCAGAAGACGGCATAACGAGATGGAGCGTCTCGTGGGCTCGGAGATGTG

v2\_Ad2.56\_TTCGCGGC  
v2\_Ad2.57\_CGGTTCCC  
v2\_Ad2.58\_ACCGGCTA  
v2\_Ad2.59\_CTCATGGG  
v2\_Ad2.60\_TTTAATGC  
v2\_Ad2.61\_AAACGGTC  
v2\_Ad2.62\_GATCCAAA  
v2\_Ad2.63\_ATGATGAT  
v2\_Ad2.64\_CCAACACG  
v2\_Ad2.65\_TAACAACA  
v2\_Ad2.66\_GGTAAACC  
v2\_Ad2.67\_CATCGACC  
v2\_Ad2.68\_ATGGGAAC  
v2\_Ad2.69\_CGGCCAAT  
v2\_Ad2.70\_GGGAATGA  
v2\_Ad2.71\_GTATTCGG  
v2\_Ad2.72\_TCAGCTAT  
v2\_Ad2.73\_ATTTATCT  
v2\_Ad2.74\_ACAGTTGC  
v2\_Ad2.75\_CCCGAGAT  
v2\_Ad2.76\_TAATGTCT  
v2\_Ad2.77\_GCCAATTC  
v2\_Ad2.78\_CGCCGTGC  
v2\_Ad2.79\_CTGACCGA  
v2\_Ad2.80\_CATTTCGA  
v2\_Ad2.81\_GCTTGCCA  
v2\_Ad2.82\_TTCTACCA  
v2\_Ad2.83\_ACGTGACG  
v2\_Ad2.84\_TGTCCGCG  
v2\_Ad2.85\_TTAAACTT  
v2\_Ad2.86\_ACCACAAC  
v2\_Ad2.87\_GCCTCTGG  
v2\_Ad2.88\_TCGCCCAC  
v2\_Ad2.89\_CACTAGGC  
v2\_Ad2.90\_TCGAAGCC  
v2\_Ad2.91\_GCATGTAC  
v2\_Ad2.92\_GTTGAGT  
v2\_Ad2.93\_CCGGGCGC  
v2\_Ad2.94\_AGATTTAA  
v2\_Ad2.95\_CACCATTG  
v2\_Ad2.96\_AATAAGAC

CAAGCAGAAGACGGCATAACGAGATGCCGCGAAGTCTCGTGGGCTCGGAGATGTG  
CAAGCAGAAGACGGCATAACGAGATGGGAACCGGTCTCGTGGGCTCGGAGATGTG  
CAAGCAGAAGACGGCATAACGAGATTAGCCGGTGTCTCGTGGGCTCGGAGATGTG  
CAAGCAGAAGACGGCATAACGAGATCCCATGAGGTCTCGTGGGCTCGGAGATGTG  
CAAGCAGAAGACGGCATAACGAGATGCATTAAGTCTCGTGGGCTCGGAGATGTG  
CAAGCAGAAGACGGCATAACGAGATGACCGTTTGTCTCGTGGGCTCGGAGATGTG  
CAAGCAGAAGACGGCATAACGAGATTTTGGATCGTCTCGTGGGCTCGGAGATGTG  
CAAGCAGAAGACGGCATAACGAGATATCATCATGTCTCGTGGGCTCGGAGATGTG  
CAAGCAGAAGACGGCATAACGAGATCGTGTGGGTCTCGTGGGCTCGGAGATGTG  
CAAGCAGAAGACGGCATAACGAGATTGTTGTTAGTCTCGTGGGCTCGGAGATGTG  
CAAGCAGAAGACGGCATAACGAGATGGTTTACCGTCTCGTGGGCTCGGAGATGTG  
CAAGCAGAAGACGGCATAACGAGATGGTCGATGGTCTCGTGGGCTCGGAGATGTG  
CAAGCAGAAGACGGCATAACGAGATGTTCCCATGTCTCGTGGGCTCGGAGATGTG  
CAAGCAGAAGACGGCATAACGAGATATTGGCCGGTCTCGTGGGCTCGGAGATGTG  
CAAGCAGAAGACGGCATAACGAGATTCATCCCCGTCTCGTGGGCTCGGAGATGTG  
CAAGCAGAAGACGGCATAACGAGATCCGAATACGTCTCGTGGGCTCGGAGATGTG  
CAAGCAGAAGACGGCATAACGAGATATAGCTGAGTCTCGTGGGCTCGGAGATGTG  
CAAGCAGAAGACGGCATAACGAGATAGATAAATGTCTCGTGGGCTCGGAGATGTG  
CAAGCAGAAGACGGCATAACGAGATGCAACTGTGTCTCGTGGGCTCGGAGATGTG  
CAAGCAGAAGACGGCATAACGAGATATCTCGGGTCTCGTGGGCTCGGAGATGTG  
CAAGCAGAAGACGGCATAACGAGATAGACATTAGTCTCGTGGGCTCGGAGATGTG  
CAAGCAGAAGACGGCATAACGAGATGAATTGGCGTCTCGTGGGCTCGGAGATGTG  
CAAGCAGAAGACGGCATAACGAGATGCACGGCGGTCTCGTGGGCTCGGAGATGTG  
CAAGCAGAAGACGGCATAACGAGATTCGGTCAGGTCTCGTGGGCTCGGAGATGTG  
CAAGCAGAAGACGGCATAACGAGATTCGAAATGGTCTCGTGGGCTCGGAGATGTG  
CAAGCAGAAGACGGCATAACGAGATTGGCAAGCGTCTCGTGGGCTCGGAGATGTG  
CAAGCAGAAGACGGCATAACGAGATTGGTAGAAGTCTCGTGGGCTCGGAGATGTG  
CAAGCAGAAGACGGCATAACGAGATCGTCACGTGTCTCGTGGGCTCGGAGATGTG  
CAAGCAGAAGACGGCATAACGAGATCGCGGACAGTCTCGTGGGCTCGGAGATGTG  
CAAGCAGAAGACGGCATAACGAGATAAGTTTAAGTCTCGTGGGCTCGGAGATGTG  
CAAGCAGAAGACGGCATAACGAGATGTTGTGGTGTCTCGTGGGCTCGGAGATGTG  
CAAGCAGAAGACGGCATAACGAGATCCAGAGGCGTCTCGTGGGCTCGGAGATGTG  
CAAGCAGAAGACGGCATAACGAGATGTGGGCGAGTCTCGTGGGCTCGGAGATGTG  
CAAGCAGAAGACGGCATAACGAGATGCCTAGTGGTCTCGTGGGCTCGGAGATGTG  
CAAGCAGAAGACGGCATAACGAGATGGCTTCGAGTCTCGTGGGCTCGGAGATGTG  
CAAGCAGAAGACGGCATAACGAGATGTACATGCGTCTCGTGGGCTCGGAGATGTG  
CAAGCAGAAGACGGCATAACGAGATACTCGAACGTCTCGTGGGCTCGGAGATGTG  
CAAGCAGAAGACGGCATAACGAGATGCCGCCGGTCTCGTGGGCTCGGAGATGTG  
CAAGCAGAAGACGGCATAACGAGATTTAAATCTGTCTCGTGGGCTCGGAGATGTG  
CAAGCAGAAGACGGCATAACGAGATCAATGGTGGTCTCGTGGGCTCGGAGATGTG  
CAAGCAGAAGACGGCATAACGAGATGTCTTATTGTCTCGTGGGCTCGGAGATGTG

---

## Supplementary References

- <sup>1</sup> Buenrostro, J. D. et al. Single-cell chromatin accessibility reveals principles of regulatory variation. *Nature* **523**, 486–490 (2015).
